# Supplementary material for: Activity of Daily Living Impairment and Associated Factors Among Older Adults of the Gelao Ethnic Group in China: A Cross-Sectional Study
Source: Research Square preprint supplement (doi:10.21203/rs.3.rs-7385052/v1), 2025-09-30
Supplement: Supplementary file 1 [file d89734cbbcd9c574ae5e537b.docx]

STROBE Statement—checklist of items that should be included in reports of observational studies

|  | Item No. | Recommendation | Page  No. | Relevant text from manuscript |
| --- | --- | --- | --- | --- |
| **Title and abstract** | 1 | (*a*) Indicate the study’s design with a commonly used term in the title or the abstract | 1 | The title already contains "Cross-Sectional Study", |
| (*b*) Provide in the abstract an informative and balanced summary of what was done and what was found | 1-2 | The abstract contains:  · Subjects: 2712 people aged ≥65 years in Gelao area of Guizhou Province  · Methods: Multi-stage stratified sampling + collecting the general information and past medical history of the subjects, and assessing the activities of daily living (ADL) and Mini-mental State Examination (MMSE) + multivariate Logistic regression  · Results: The prevalence of ADL disability in the elderly was 27.51% (95%CI: 25.83-29.19), and the rate of ADL disability was higher in women than in men.  · Conclusion: Education level, income level, living habits, cognitive status, and disease history were associated with the impairment of activities of daily living. |
| Introduction | | | |  |
| Background/rationale | 2 | Explain the scientific background and rationale for the investigation being reported | 2-4 | Gelao is a ethnic group with a long history on the Yunnan-Guizhou Plateau in southwest China, mainly distributed in Guizhou Province, accounting for 97% of its total population [13]. Gelao people had unique eating and living habits. Gelao population's intake of oil and salt is usually much higher than the normal standard, and its unique dietary culture directly leads to the high incidence of chronic diseases such as hypertension and hyperlipidemia [17]. There are limited reports on the impairment of activities of daily living (ADL) and its influencing factors in the elderly ethnic minorities in China. |
| Objectives | 3 | State specific objectives, including any prespecified hypotheses |  | 1. Describe the epidemiological characteristics (prevalence and distribution differences) of ADL impairment in the Gelao ethnic group.2. Analyze the independent influencing factors of ADL impairmentPreconceived assumptions: Aging, poor living and dietary habits, and a high number of chronic diseases increase the risk of impaired ADL |
| Methods | | | |  |
| Study design | 4 | Present key elements of study design early in the paper |  | The first paragraph of the methodology states: "This study was a community-based cross-sectional observational study conducted from August to October 2022 in Wuchuan Gelao and Daozhen Gelao and Miao autonomous counties in Guizhou Province. Data were collected through face-to-face questionnaire surveys and physical examinations. All procedures were approved by the Ethics Committee of the Third Affiliated Hospital of Zunyi Medical University (approval No. KLLY-2022-085) |
| Setting | 5 | Describe the setting, locations, and relevant dates, including periods of recruitment, exposure, follow-up, and data collection |  | The first paragraph of the methodology states: "This study was a community-based cross-sectional observational study conducted from August to October 2022 in Wuchuan Gelao and Daozhen Gelao and Miao autonomous counties in Guizhou Province. Data were collected through face-to-face questionnaire surveys and physical examinations. All procedures were approved by the Ethics Committee of the Third Affiliated Hospital of Zunyi Medical University (approval No. KLLY-2022-085)  · Study site: 6 townships in 2 counties  · Recruitment time: 2022.8.1-2022.10.1  · Data collection time: questionnaire and physical examination were completed on the day of recruitment without follow-up (cross-sectional design)  · Data collation time: 2023.1.1-2023.12.31 |
| Participants | 6 | (*a*) *Cohort study*—Give the eligibility criteria, and the sources and methods of selection of participants. Describe methods of follow-up  *Case-control study*—Give the eligibility criteria, and the sources and methods of case ascertainment and control selection. Give the rationale for the choice of cases and controls  *Cross-sectional study*—Give the eligibility criteria, and the sources and methods of selection of participants |  | Inclusion criteria: ①Aged 65 or above; ②Belonging to the Gelao ethnic group; ③Having a permanent residence in the surveyed area (defined as holding local household registration or residing there for ≥5 years) and not planning to leave during the investigation; ④Providing informed consent and signing the relevant consent form.  Exclusion criteria: ①Having a permanent residence in the surveyed area but living long - term elsewhere; ②Suffering from severe mental disorders such as schizophrenia or mania (based on the diagnostic criteria of the Diagnostic and Statistical Manual of Mental Disorders, Fifth Edition); ③Having severe hearing loss (average pure - tone hearing threshold＞80dB HL), severe visual impairment (corrected visual acuity＜0.1), or severe aphasia (aphasia severity grade≥3).  · Source: Registered residents from community health service centers in 6 towns  · Sampling method: multi-stage stratified sampling (township → village → household) |
| (*b*)*Cohort study*—For matched studies, give matching criteria and number of exposed and unexposed  *Case-control study*—For matched studies, give matching criteria and the number of controls per case |  | Not Applicable. |
| Variables | 7 | Clearly define all outcomes, exposures, predictors, potential confounders, and effect modifiers. Give diagnostic criteria, if applicable |  | · Exposure factors:  Core exposure: age  -Other exposures: educational level, lifestyle  Confounding factors: gender, smoking history, drinking history, number of chronic diseases  · Effect modifier: prespecified "gender" (to analyze differences in influencing factors between male and female groups) |
| Data sources/ measurement | 8* | For each variable of interest, give sources of data and details of methods of assessment (measurement). Describe comparability of assessment methods if there is more than one group | *7* | *Smoking was defined as smoking at least one cigarette daily for over a year. For leaf tobacco, 1g was considered equivalent to one cigarette. Former smokers were those who had smoked before but had not smoked in the past year. Drinking was defined as consuming at least 50ml of alcohol weekly for over six months. Former drinkers were those who had drunk before but had not drunk in the past year. Social activities referred to self - reported participation in at least one 30 - minute social activity (e.g., card or mahjong games) weekly. Exercise meant self - reported engagement in at least one 30 - minute physical activity (e.g., farming, square dancing, walking, running) weekly. Chronic diseases were defined as a history of chronic illnesses diagnosed in secondary - level Class - A hospitals or above, or currently undergoing medication for chronic diseases. Sleep disorders were defined as abnormalities in sleep quantity or quality, or clinical symptoms during sleep such as reduced sleep time, increased nighttime awakenings, difficulty falling back asleep after waking, and early - morning awakenings[20].* |
| Bias | 9 | Describe any efforts to address potential sources of bias | 8 | The survey team was composed of ten members, including two experienced physicians (one associate chief physician and one attending physician), two master's students from Zunyi Medical University, and six undergraduate students from the same university. All surveyors were proficient in the local Guizhou dialect and Mandarin. Before the survey, all team members underwent four unified training sessions at the affiliated hospital of Zunyi Medical University. Assessors used uniform instructions, questionnaires, and standardized wording to conduct one - on - one scale assessments and data collection face - to - face with eligible participants. After the survey, designated personnel collected, organized, and stored the data daily. |
| Study size | 10 | Explain how the study size was arrived at | 6 | By referring to the literature and considering a prevalence of impaired activities of daily living of 17.21%[12], a sample size of 2,498 was determined using PASS software with a 95% confidence interval (CI), an error margin of no more than 3%, and α = 0.05.The total sample size was evenly distributed across the three strata (urban, suburban, and remote areas), with 833 samples per stratum. |

Continued on next page

| Quantitative variables | 11 | Explain how quantitative variables were handled in the analyses. If applicable, describe which groupings were chosen and why | 8 | · Age: grouped according to the WHO elderly staging standard (65-69, 70-74, 75-79, 80 years old and above)  · BMI: according to the standard of overweight/obesity in Chinese adults (< 18.5kg/m²= low weight, 18.5-23.9kg/m²= normal, ≥24kg/m²= overweight/obesity)  · Number of chronic diseases: Yes and no |
| --- | --- | --- | --- | --- |
| Statistical methods | 12 | (*a*) Describe all statistical methods, including those used to control for confounding | 9-10 | SPSS 29.0 was utilized for statistical analysis. Continuous variables were assessed for normality using the Shapiro - Wilk test. Normally distributed data are presented as mean±standard deviation and compared between groups using independent - samples t - tests (with homogeneity of variance assessed by Levene's test). Non - normally distributed data are presented as medians (interquartile ranges) and compared using the Mann - Whitney U test. Categorical variables are described as frequencies (percentages), with group differences analyzed using the chi - square test or Fisher's exact probability test. Univariate logistic regression was employed for initial screening of potential influencing factors (with P<0.05 variables retained), followed by multivariate logistic regression (Enter method) to evaluate independent influencing factors. Odds ratios (ORs) and 95% confidence intervals were calculated. A two - tailed α level of 0.05 was used, with P<0.05 indicating statistical significance. |
| (*b*) Describe any methods used to examine subgroups and interactions | 11 | · Stratified by gender (male/female), gender differences in the influencing factors of ADL disability were analyzed  Validate risk profiles for older age groups, stratified by age (65-69, 70-74, 75-79, 80, and older) |
| (*c*) Explain how missing data were addressed | 10 | If too many missing data were deleted, if missing values were small, telephone contact was used to complete the data |
| (*d*) *Cohort study*—If applicable, explain how loss to follow-up was addressed  *Case-control study*—If applicable, explain how matching of cases and controls was addressed  *Cross-sectional study*—If applicable, describe analytical methods taking account of sampling strategy |  | "Sampling weight" was used to adjust the analysis results: weight = (total township population/sample population) × (total county population/total township population) to ensure sample representativeness. The difference between unweighted and weighted results was < 5%. |
| (*e*) Describe any sensitivity analyses |  | Not Applicable. |
| Results | | | | |
| Participants | 13* | (a) Report numbers of individuals at each stage of study—eg numbers potentially eligible, examined for eligibility, confirmed eligible, included in the study, completing follow-up, and analysed | 10 | A total of 2,843 participants were enrolled in the study, yielding 2,712 valid questionnaires and a response rate of 95.39%. 177 invalid questionnaires were excluded due to incomplete information, random responses, and logical errors. |
| (b) Give reasons for non-participation at each stage |  | Not Applicable. |
| (c) Consider use of a flow diagram |  | Not Applicable. |
| Descriptive data | 14* | (a) Give characteristics of study participants (eg demographic, clinical, social) and information on exposures and potential confounders | 11 | They were grouped according to ADL status (impaired group n=27.51%, normal group n=72.49%). |
| (b) Indicate number of participants with missing data for each variable of interest | 10 | A total of 2,843 participants were enrolled in the study, yielding 2,712 valid questionnaires and a response rate of 95.39%. 177 invalid questionnaires were excluded due to incomplete information, random responses, and logical errors. |
| (c) *Cohort study*—Summarise follow-up time (eg, average and total amount) |  | Not Applicable. |
| Outcome data | 15* | *Cohort study*—Report numbers of outcome events or summary measures over time |  | Not Applicable. |
| *Case-control study—*Report numbers in each exposure category, or summary measures of exposure |  | Not Applicable. |
| *Cross-sectional study—*Report numbers of outcome events or summary measures | *10-13* | *a total of 746 individuals exhibited ADL impairment, yielding a prevalence rate of 27.51% (95% CI: 25.83–29.19). When stratified by gender, the prevalence among males was 38.20% (95% CI: 35.62–40.79) compared to 61.80% (95 % CI: 59.21–64.39) among females. In terms of age groups, the prevalence rates were as follows: 13.27 %(95 %CI : 13.02-15.78 ) for those aged 65–69 years, 24 .40 % (95 %CI : 21.42-27.38 ) for ages 70-74 , 25.20 % (95 %CI: 21.79-28.61 ) for ages 75 -79, and 37.13 % (95 %CI: 33.22-41.04) for those aged ≥80 years old.* |
| Main results | 16 | (*a*) Give unadjusted estimates and, if applicable, confounder-adjusted estimates and their precision (eg, 95% confidence interval). Make clear which confounders were adjusted for and why they were included | 31.32 | Multivariate Logistic regression results (with ADL impairment as dependent variable) : |
| (*b*) Report category boundaries when continuous variables were categorized |  | Not Applicable. |
| (*c*) If relevant, consider translating estimates of relative risk into absolute risk for a meaningful time period |  | Not Applicable. |

Continued on next page

| Other analyses | 17 | Report other analyses done—eg analyses of subgroups and interactions, and sensitivity analyses |  |  |
| --- | --- | --- | --- | --- |
| Discussion | | | | |
| Key results | 18 | Summarise key results with reference to study objectives |  |  |
| Limitations | 19 | Discuss limitations of the study, taking into account sources of potential bias or imprecision. Discuss both direction and magnitude of any potential bias |  |  |
| Interpretation | 20 | Give a cautious overall interpretation of results considering objectives, limitations, multiplicity of analyses, results from similar studies, and other relevant evidence |  |  |
| Generalisability | 21 | Discuss the generalisability (external validity) of the study results |  |  |
| Other information | |  | | |
| Funding | 22 | Give the source of funding and the role of the funders for the present study and, if applicable, for the original study on which the present article is based |  |  |

*Give information separately for cases and controls in case-control studies and, if applicable, for exposed and unexposed groups in cohort and cross-sectional studies.

**Note:** An Explanation and Elaboration article discusses each checklist item and gives methodological background and published examples of transparent reporting. The STROBE checklist is best used in conjunction with this article (freely available on the Web sites of PLoS Medicine at http://www.plosmedicine.org/, Annals of Internal Medicine at http://www.annals.org/, and Epidemiology at http://www.epidem.com/). Information on the STROBE Initiative is available at www.strobe-statement.org.
